# Supplementary material for: A ratiometric fluorescence probe for the selective detection of H2S in serum using a pyrene-DPA–Cd2+ complex
Source: Royal Society of Chemistry journal article supplement (doi:10.1039/d1ra04277g), 2021-01-01
Supplement: d1ra04277g1.pdf [file d1ra04277g1.pdf]

**Electronic Supplementary information**

***Ratiometric fluorescence probe for the selective detection of H<sub>2</sub>S in serum using pyrene-DPA-Cd<sup>2+</sup> complex***

Jihoon Kim,‡ Jinyoung Oh‡ and Min Su Han\*

Department of Chemistry, Gwangju Institute of Science and Technology (GIST), Gwangju 61005,

Republic of Korea

\* Corresponding author. E-mail: happyhan@gist.ac.kr

## Fluorescence spectra of pyrene-DPA complex with metal ions

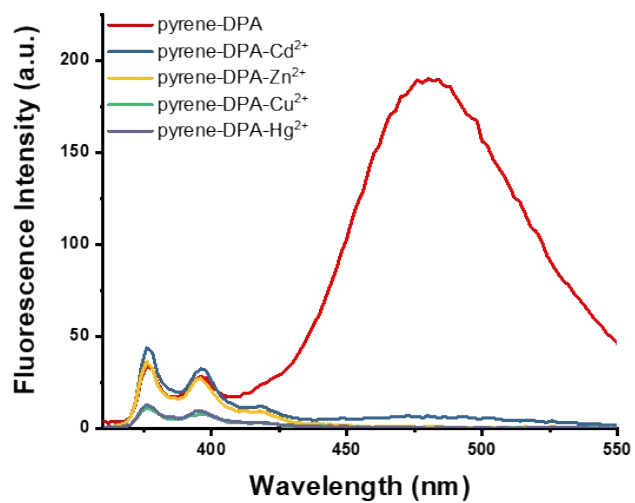

**Figure S1** Fluorescence spectra of pyrene-DPA complex with various metal ions ( $\text{Cd}^{2+}$ ,  $\text{Zn}^{2+}$ ,  $\text{Cu}^{2+}$ , and  $\text{Hg}^{2+}$ ) in buffer solution (HEPES, 20 mM, pH 7.4).  $[\text{pyrene-DPA}] = 20 \mu\text{M}$ ,  $[\text{metal ion}] = 20 \mu\text{M}$ ,  $\lambda_{\text{ex}} = 341 \text{ nm}$ .

## Fluorescence change of pyrene-DPA-Cd<sup>2+</sup> or Zn<sup>2+</sup> complex with PPI

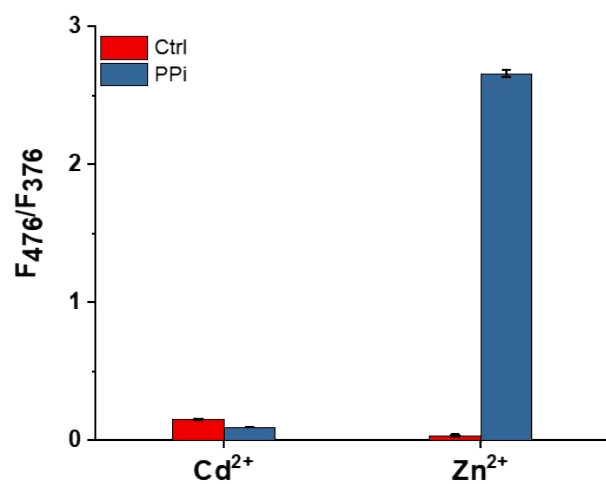

**Figure S2** Fluorescence change in excimer against monomer emission of pyrene-DPA-Cd<sup>2+</sup> or Zn<sup>2+</sup> complex with PPI (50  $\mu$ M) in the buffer solution (HEPES, 20 mM, pH 7.4),  $\lambda_{\text{ex}} = 341$  nm.

## H<sub>2</sub>S and Cys detection in different pH condition

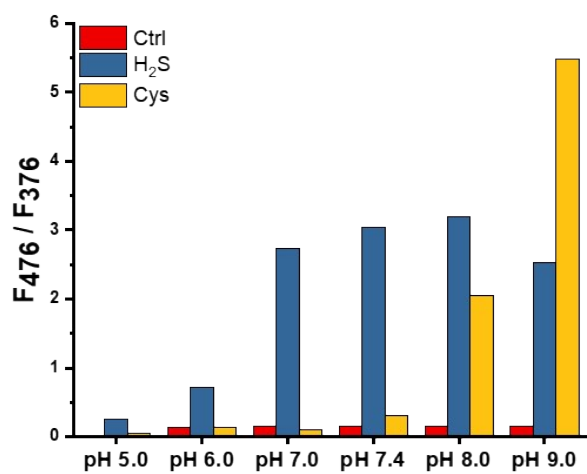

**Figure S3** Fluorescence change of pyrene-DPA-Cd<sup>2+</sup> complex with H<sub>2</sub>S and Cys in different buffer solutions (20 mM). [pyrene-DPA-Cd<sup>2+</sup> complex] = 20  $\mu$ M, [H<sub>2</sub>S] = 60  $\mu$ M, [Cys] = 60  $\mu$ M, pH 5.0: Acetate, pH 6.0: MES, pH 7.0, 7.4, and 8.0: HEPES, pH 9.0: Tris,  $\lambda_{\text{ex}}$  = 341 nm.

### Response time for detection of H<sub>2</sub>S by pyrene-DPA-Cd<sup>2+</sup> complex

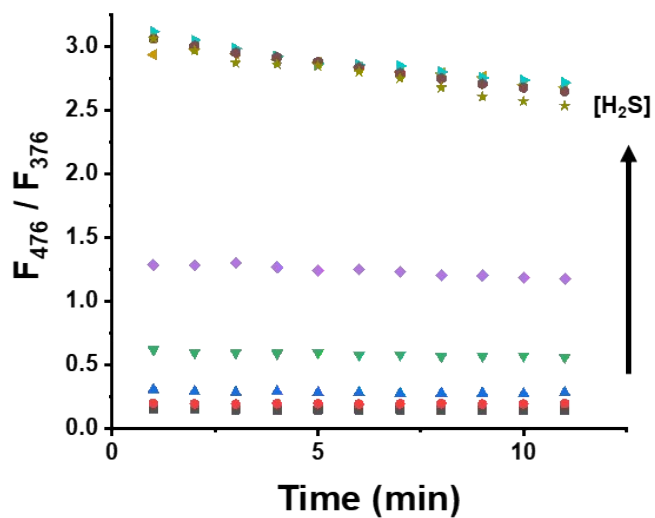

**Figure S4** Plot of Fluorescence change of pyrene-DPA-Cd<sup>2+</sup> complex with various concentrations of H<sub>2</sub>S along with time in buffer solution (HEPES, 20 mM, pH 7.0). [pyrene-DPA-Cd<sup>2+</sup> complex] = 20  $\mu$ M, [H<sub>2</sub>S] = 0.0, 0.5, 1.0, 5.0, 10.0, 20.0, 30.0, 40.0, 50.0  $\mu$ M,  $\lambda_{ex}$  = 341 nm.

## Estimated limit of detection (LOD) for H<sub>2</sub>S detection

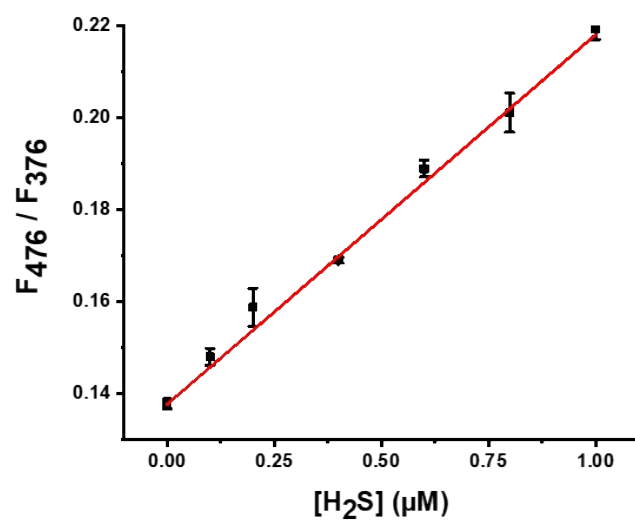

**Figure S5** Plot of change of fluorescence ratio at 476 nm and 376 nm against H<sub>2</sub>S concentrations (0, 0.1, 0.4, 0.6, 0.8, and 1.0 μM),  $\lambda_{\text{ex}} = 341$  nm.

Stdev. of blank ( $\sigma$ ) = 0.00188

Slope (S) = 0.08036

$R^2 = 0.9948$

Limit of detection (LOD) = 70.18 nM from  $3\sigma/S$
